# Supplementary material for: Risky Business? Evaluating Hydrogen Partnerships Established by Germany, The Netherlands, and Belgium
Source: MDPI journal article supplement (doi:10.3390/su152416876), 2023-12-15
Supplement: s1 [file s1]

## Supplementary Materials

### Supplementary S1: Supporting materials for the multi-criteria analysis

Table S1. Prospective hydrogen partnerships (until August 2023)

| Prospective importer | Prospective exporter | Date partnership |
|----------------------|----------------------|------------------|
| Belgium              | Chile                | 2021             |
| Belgium              | Namibia              | 2021             |
| Belgium              | Oman                 | 2021             |
| Belgium              | Egypt                | 2022             |
| Belgium              | Norway               | 2022             |
| Germany              | DR Congo             | 2020             |
| Germany              | Ukraine              | 2020             |
| Germany              | Australia            | 2021             |
| Germany              | Brazil               | 2021             |
| Germany              | Chile                | 2021             |
| Germany              | Denmark              | 2021             |
| Germany              | Namibia              | 2021             |
| Germany              | Russian Federation   | 2021             |
| Germany              | Saudi Arabia         | 2021             |
| Germany              | Tunisia              | 2021             |
| Germany              | UAE                  | 2021             |
| Germany              | Mexico               | 2021             |
| Germany              | Norway               | 2023             |
| Germany              | Turkey               | 2021             |
| Germany              | India                | 2022             |
| Germany              | Qatar                | 2022             |
| Germany              | Nigeria              | 2022             |
| Germany              | Angola               | 2022             |
| Germany              | Canada               | 2022             |
| Germany              | Kazakhstan           | 2022             |
| Germany              | Algeria              | 2022             |
| Germany              | Kenya                | 2023             |
| The Netherlands      | Portugal             | 2020             |
| The Netherlands      | Australia            | 2021             |
| The Netherlands      | Canada               | 2021             |
| The Netherlands      | Chile                | 2021             |
| The Netherlands      | Iceland              | 2021             |
| The Netherlands      | Morocco              | 2021             |
| The Netherlands      | Namibia              | 2021             |
| The Netherlands      | Oman                 | 2021             |
| The Netherlands      | South Africa         | 2021             |
| The Netherlands      | Uruguay              | 2021             |
| The Netherlands      | UAE                  | 2023             |
| The Netherlands      | Spain                | 2023             |
| The Netherlands      | Oman                 | 2022             |

**Table S2: Content analysis of indicator literature**

| <b>Dimension</b>      | <b>Indicators</b>                                         | <b>#</b> | <b>Mentioned in</b>                                                                                                                           |
|-----------------------|-----------------------------------------------------------|----------|-----------------------------------------------------------------------------------------------------------------------------------------------|
| <b>Technological</b>  | Renewable energy potential                                | 6        | Pflugmann & De Blasio [28], Eicke & De Blasio [30], Perner & Brothe [33] Breitschopf et.al [41], Aditiya & Aziz [70], Ikonnikova et al. [29], |
| <b>Technological</b>  | Freshwater availability                                   | 5        | Pflugmann & De Blasio [28], Eicke & De Blasio [30], Perner & Brothe [33], Breitschopf et.al [41], Ikonnikova et al. [29],                     |
| <b>Sustainability</b> | Domestic energy demand                                    | 4        | Breitschopf et.al [41], Heinemann & Mendelevitch [40], Bouacida & Berghmans [42], Bouacida [39],                                              |
| <b>Sustainability</b> | Water availability                                        | 4        | Breitschopf et.al [41], Heinemann & Mendelevitch [40] Lindner [37] Bouacida [39]                                                              |
| <b>Political</b>      | Corruption index                                          | 4        | Lindner [37], Perner & Brothe [33] Breitschopf et.al [41], Heinemann & Mendelevitch [40]                                                      |
| <b>Political</b>      | Fragile state index                                       | 3        | Lindner [37], Perner & Brothe [33] Breitschopf et.al [41]                                                                                     |
| <b>Political</b>      | Ease of doing business index                              | 3        | Lindner [37], Brauer, Truby and Villavicencio [34], Perner & Brothe [33]                                                                      |
| <b>Economic</b>       | Supply costs                                              | 3        | Brauer, Truby and Villavicencio [34], Ikonnikova et al. [29], Moritz, Schönfisch and Schulte [27]                                             |
| <b>Economic</b>       | Production costs                                          | 3        | Brauer, Truby and Villavicencio [34], Perner & Brothe [33], Breitschopf et.al [41]                                                            |
| <b>Sustainability</b> | Air emissions (EPI)                                       | 2        | Breitschopf et.al [41], Teske, Niklas and Mey [47]                                                                                            |
| <b>Sustainability</b> | Human Rights                                              | 2        | Heinemann & Mendelevitch [40], Teske, Niklas and Mey [47]                                                                                     |
| <b>Political</b>      | Rule of law index                                         | 2        | Lindner [37], Breitschopf et.al [41]                                                                                                          |
| <b>Political</b>      | Political stability                                       | 2        | Brauer, Truby and Villavicencio [34], Breitschopf et.al [41]                                                                                  |
| <b>Political</b>      | R&D spending per capita                                   | 2        | Brauer, Truby and Villavicencio [34], Teske, Niklas and Mey [47]                                                                              |
| <b>Economic</b>       | Strength of the economy (GDP per capita)                  | 2        | Brauer, Truby and Villavicencio [34], Aditiya & Aziz (2021)                                                                                   |
| <b>Economic</b>       | Experience in handling gas or renewable energy            | 2        | Brauer, Truby and Villavicencio [34], Perner & Brothe [33]                                                                                    |
| <b>Sustainability</b> | HDI                                                       | 2        | Lindner [37], Aditiya & Aziz [70]                                                                                                             |
| <b>Sustainability</b> | Waste management (EPI)                                    | 2        | Breitschopf et.al [41] Teske, Niklas and Mey [47]                                                                                             |
| <b>Technological</b>  | Availability of CO <sub>2</sub>                           | 1        | Perner & Brothe [33]                                                                                                                          |
| <b>Technological</b>  | Risk index (disasters)                                    | 1        | Breitschopf et.al [41]                                                                                                                        |
| <b>Technological</b>  | Ports (terminals and handling capacity)                   | 1        | Breitschopf et.al [41]                                                                                                                        |
| <b>Technological</b>  | Pipelines (domestic, reserves, export connection with EU) | 1        | Breitschopf et.al [41]                                                                                                                        |

|                        |                                                                |   |                               |
|------------------------|----------------------------------------------------------------|---|-------------------------------|
| <b>Technological</b>   | Transport distance                                             | 1 | Breitschopf et.al [41]        |
| <b>Technological</b>   | Utilities (access to electricity, water)                       | 1 | Breitschopf et.al [41]        |
| <b>Technological</b>   | Export of chemicals                                            | 1 | Breitschopf et.al [41]        |
| <b>Sustainability</b>  | Share of population in extreme poverty                         | 1 | Lindner [37]                  |
| <b>Sustainability</b>  | Share of youth not in education                                | 1 | Lindner [37]                  |
| <b>Sustainability</b>  | Share of population with access to electricity                 | 1 | Perner & Brothe [33]          |
| <b>Sustainability</b>  | Heavily indebted poor countries                                | 1 | Perner & Brothe [33]          |
| <b>Sustainability</b>  | Biodiversity                                                   | 1 | Breitschopf et.al [41]        |
| <b>Sustainability</b>  | Land use                                                       | 1 | Heinemann & Mendelevitch [40] |
| <b>Sustainability</b>  | Protected areas                                                | 1 | Breitschopf et.al [41]        |
| <b>Sustainability</b>  | R&D spending per capita                                        | 1 | Aditiya & Aziz [70]           |
| <b>Sustainability</b>  | Local communities                                              | 1 | Teske, Niklas and Mey [47]    |
| <b>Sustainability</b>  | Perspectives for development                                   | 1 | Perner & Brothe [33]          |
| <b>Political</b>       | Global democracy index                                         | 1 | Lindner [37]                  |
| <b>Political</b>       | Freedom index                                                  | 1 | Lindner [37]                  |
| <b>Political</b>       | World press index                                              | 1 | Lindner [37]                  |
| <b>Political</b>       | Attitude towards renewable energies (RES targets)              | 1 | Perner & Brothe [33]          |
| <b>Political</b>       | Voice and accountability index                                 | 1 | Breitschopf et.al [41]        |
| <b>Political</b>       | Regulatory quality                                             | 1 | Breitschopf et.al [41]        |
| <b>Political</b>       | Signatories to energy charter (EU or international)            | 1 | Breitschopf et.al [41]        |
| <b>Political</b>       | World bank RISE (regulatory indicators for sustainable energy) | 1 | Breitschopf et.al [41]        |
| <b>Political</b>       | GII Human capital and research                                 | 1 | Breitschopf et.al [41]        |
| <b>Socio-political</b> | Global quality infrastructure index                            | 1 | Breitschopf et.al [41]        |
| <b>Socio-political</b> | Government effectiveness                                       | 1 | Breitschopf et.al [41]        |
| <b>Economic</b>        | Costs of RES                                                   | 1 | Perner & Brothe [33]          |
| <b>Economic</b>        | Export oriented economy                                        | 1 | Perner & Brothe [33]          |
| <b>Economic</b>        | Share of fossil fuels in national income                       | 1 | Perner & Brothe [33]          |

Table S3 : Coding of the indicators (green is “one”, red is “zero”)

| Country                      | Access to electricity | Water stress | % RE in electricity | CPI | FSI   | EODB | Production costs | DES costs |
|------------------------------|-----------------------|--------------|---------------------|-----|-------|------|------------------|-----------|
| Algeria                      | 99,8                  | 84,01        | 0,84                | 33  | 72,2  | 48,6 | 107              | 173       |
| Angola                       | 46,9                  | 0,48         | 70,79               | 33  | 88,1  | 41,3 | 138              | 241       |
| Australia                    | 100                   | 3,93         | 32,28               | 75  | 22,7  | 81,2 | 103              | 189       |
| Brazil                       | 100                   | 1,55         | 86,94               | 38  | 73,9  | 59,1 | 113              | 195       |
| Canada                       | 100                   | 3,73         | 69,74               | 74  | 20,1  | 79,6 | 97               | 167       |
| Chile                        | 100                   | 21,62        | 52,96               | 67  | 43,2  | 72,6 | 100              | 171       |
| Democratic republic of Congo | 19,1                  | 24,94        | 83,96               | 20  | 107,3 | 36,2 | 139              | 228       |
| Denmark                      | 100                   | 0,23         | 99,73               | 90  | 18,1  | 85,3 | 89               | 144       |
| Egypt                        | 100                   | 141,17       | 11,22               | 30  | 83,6  | 60,1 | 139              | 216       |
| Iceland                      | 100                   | 0,39         | 99,99               | 74  | 17,1  | 79   | 90               | 149       |
| India                        | 100                   | 66,49        | 20,48               | 40  | 75,3  | 71   | 103              | 194       |
| Kazakhstan                   | 100                   | 32,65        | 11,34               | 36  | 59,5  | 79,6 | 128              | 224       |
| Kenya                        | 71,4                  | 13,13        | 89,78               | 32  | 88,2  | 73,2 | 98               | 198       |
| Mexico                       | 99,4                  | 19,39        | 22,94               | 31  | 70,3  | 72,4 | 95               | 168       |
| Morocco                      | 100                   | 50,75        | 17,38               | 38  | 70,1  | 73,4 | 93               | 155       |
| Namibia                      | 56,3                  | 0,86         | 95,54               | 49  | 62,9  | 61,4 | 105              | 197       |
| Nigeria                      | 55,4                  | 4,36         | 27,51               | 24  | 97,2  | 56,9 | 118              | 213       |
| Norway                       | 100                   | 2,05         | 98,97               | 84  | 15,6  | 82,6 | 75               | 131       |
| Oman                         | 100                   | 116,71       | 0,43                | 44  | 49,5  | 70   | 91               | 171       |
| Qatar                        | 100                   | 431,03       | 0,07                | 58  | 42,3  | 68,7 | 86               | 155       |
| Portugal                     | 100                   | 12,32        | 59,82               | 62  | 27,5  | 76,5 | 119              | 179       |
| Russian Federation           | 100                   | 4,12         | 18,36               | 28  | 72,6  | 78,2 | 136              | 222       |
| Saudi Arabia                 | 84,4                  | 974,17       | 0,21                | 51  | 67,5  | 71,6 | 93               | 169       |
| South Africa                 | 100                   | 63,56        | 9,09                | 43  | 72    | 67   | 102              | 201       |
| Spain                        | 100                   | 26,03        | 42,22               | 60  | 44,4  | 77,9 | 94               | 161       |
| Tunisia                      | 100                   | 96           | 4,39                | 40  | 68,2  | 68,7 | 109              | 172       |
| Turkey                       | 100                   | 29,08        | 41,97               | 36  | 78,1  | 76,8 | 113              | 180       |
| UAE                          | 100                   | 1672         | 4,5                 | 67  | 39,1  | 80,9 | 91               | 161       |
| Ukraine                      | 100                   | 13,73        | 16,52               | 33  | 68,6  | 70,2 | 220              | 288       |
| Uruguay                      | 100                   | 9,79         | 84,44               | 74  | 35,2  | 61,5 | 147              | 228       |

**Table S4: Overall risk performance of countries (green is “low”, orange is “medium”, red is “high”)**

| Country            | economic risk | investment risk | justice risk |
|--------------------|---------------|-----------------|--------------|
| Algeria            | low           | high            | high         |
| Angola             | high          | high            | medium       |
| Australia          | low           | low             | low          |
| Brazil             | medium        | high            | low          |
| Canada             | low           | low             | low          |
| Chile              | low           | low             | low          |
| DR Congo           | high          | high            | low          |
| Denmark            | low           | low             | low          |
| Egypt              | high          | high            | high         |
| Iceland            | low           | low             | low          |
| India              | medium        | high            | low          |
| Kazakhstan         | high          | medium          | high         |
| Kenya              | medium        | high            | medium       |
| Mexico             | low           | high            | low          |
| Morocco            | low           | high            | medium       |
| Namibia            | medium        | high            | medium       |
| Nigeria            | high          | high            | high         |
| Norway             | low           | low             | low          |
| Oman               | low           | medium          | high         |
| Qatar              | low           | low             | high         |
| Portugal           | medium        | low             | low          |
| Russian Federation | high          | high            | medium       |
| Saudi Arabia       | low           | medium          | high         |
| South Africa       | medium        | high            | high         |
| Spain              | low           | low             | medium       |
| Tunisia            | low           | high            | medium       |
| Turkey             | low           | high            | medium       |
| UAE                | low           | low             | high         |
| Ukraine            | high          | high            | medium       |
| Uruguay            | high          | medium          | low          |

## Supplementary S2: Robustness check

This supplementary material presents the results of a series of robustness tests of the multi-criteria analysis. I test the impact of changes in the dichotomization thresholds on the categorization of the countries.

### Economic risks:

- 1) Production costs: The original threshold was set at USD 113/MWh. A first alternative and lower threshold was set at 120\$/MWh. This alternative threshold would assign both Portugal (USD119/MWh) and Nigeria (118\$/MWh) a code "one" instead of "zero". For Portugal, the alternative threshold does not change the categorization of the country. For Nigeria this would change the categorization from a "Last Resort" country to a "Volatile Venture" country. A second alternative threshold was set at USD 105/MWh. This would assign Algeria (USD 107/MWh), Brazil (USD 113/MWh), Turkey (USD 113/MWh) and Tunisia (USD 109/MWh) a code of "zero" instead of "one". For Algeria and Tunisia and Turkey, this would not change the overall country categorization. For Brazil, this would change the categorization from a "Volatile Venture" to a 'Last Resort Country'.
- 2) DES costs: The original threshold was set at USD 189/MWh. A first alternative threshold of USD 205/MWh was used. This alternative threshold would assign Brazil (USD 195/MWh), India (USD 194/MWh), Namibia (USD 197/MWh), and South-Africa (USD 201/MWh) a code of "one" instead of "zero" on this indicator. A second alternative threshold was set at USD 185/MWh. This would assign Australia (USD 189/MWh) a code of "zero" instead of "one". However, both alternative thresholds do not change the overall categorization of the country categories.

### Political risks:

- 3) Corruption Perception Index: The original threshold was set at 50. A first alternative threshold of 45 would assign Namibia (49) a "one" instead of a "zero". However, this does not change the categorization of Namibia. A second alternative threshold was set at 55 and this would assign Saudi Arabia (51) a code of "zero" instead of "one". This would change the country categorization of Saudi Arabia from a "Strategic Gambit" to a "Volatile Venture".
- 4) Fragile State Index: The original threshold was set at a score of 60. A first alternative threshold of 65 would only assign Namibia (62,9) a score of "one" instead of "zero". However, this does not change the categorization of Namibia. A second alternative categorization of 55 would assign Kazakhstan (59,5) a "zero" instead of a "one" on this indicator. Yet, this does not change the country categorization of Kazakhstan.
- 5) Ease of doing business index: The original threshold was set at 63. A first alternative threshold of 60 would change the coding of "zero" to "one" for Egypt (60.1), Namibia (61,64) and Uruguay (61,7). However, this would not change the categorization of any of these countries. A second alternative threshold was set at 65. This does not change any of the coding for this indicator.

Notably, should the alternative thresholds for the aforementioned political risk dimension categorize Namibia positively across all indicators within this dimension, Namibia would transition from being a "Volatile Venture" country to a "Strategic Gambit" country.

### Sustainability risks:

- 6) Access to electricity: The original indicator was set at 100%. A first alternative threshold of 95% would assign Algeria (99,8%) and Mexico (99,4%) a score of "one" instead of "zero". However, this would not change the overall country categorization of both countries. A second alternative threshold was not used, as there are substantial gaps within the data. For more information, check Table S3 in Supplementary S1.
- 7) Share of renewables in electricity mix: The original threshold was set at 28%. A first alternative threshold of 25% would assign Nigeria (27,51%) a score of "one" instead of zero. However, this would not change the country categorization of Nigeria. A second alternative threshold was set at 30%. This does not change the coding for this indicator.

- 8) Water stress index : The original index was set at 25%. A first alternative threshold of 30% would assign Spain (26,03%) and Turkey (29,08%) a coding of "one" instead of "zero". However, this would not change the overall country categorization of both countries. A second alternative threshold was set at 20%. This would assign Chile (21,62%) and the DRC (24,94%) an score of "zero" instead of "one". However, this would not change the overall country categorization of both countries.
