# Supplementary material for: Risky Business? Evaluating Hydrogen Partnerships Established by Germany, The Netherlands, and Belgium
Source: MDPI journal article supplement (doi:10.3390/su152416876), 2023-12-15
Supplement: s1 [file s1]

Archive with 1 entries (1 files):
- sustainability-2575361-supplementary.pdf
